# Supplementary material for: Attractor Landscapes as a Model Selection Criterion in Data Poor Environments
Source: bioRxiv or medRxiv preprint supplement (doi:10.1101/2021.11.09.466986), 2021-11-11
Supplement: Supplementary file [file media-1.pdf]

**Table S1.** Attractors Found for All Models

| Model ID | Error $\frac{O_d}{P}$ | Structural Complexity $O_c$ | Minimum Distance  |                |       | Number of Attractors |         |         |         |       |       |
|----------|-----------------------|-----------------------------|-------------------|----------------|-------|----------------------|---------|---------|---------|-------|-------|
|          |                       |                             | Immune Quiescence | Cytokine Storm | $O_r$ | $n = 1$              | $n = 2$ | $n = 3$ | $n = 4$ | Total | $O_p$ |
| 18       | 0                     | 0.7                         | 1                 | 0              | 1     | 4                    | 2       | 1       | 0       | 7     | 5.3   |
| 17       | 0                     | 0.7                         | 1                 | 0              | 1     | 5                    | 0       | 0       | 0       | 5     | 5     |
| 15       | 0                     | 0.7                         | 1                 | 0              | 1     | 3                    | 0       | 1       | 2       | 6     | 3.8   |
| 19       | 0                     | 0.7                         | 6                 | 0              | 6     | 6                    | 4       | 1       | 0       | 11    | 8.3   |
| 14       | 0                     | 0.7                         | 6                 | 0              | 6     | 5                    | 2       | 0       | 0       | 7     | 6     |
| 13       | 0                     | 0.7                         | 6                 | 0              | 6     | 3                    | 2       | 1       | 0       | 6     | 4.3   |
| 12       | 0                     | 0.7                         | 8                 | 0              | 8     | 6                    | 2       | 1       | 0       | 9     | 7.3   |
| 16       | 0                     | 0.7                         | 14                | 0              | 14    | 3                    | 2       | 0       | 0       | 5     | 4     |
| 11       | 0                     | 0.8                         | 3                 | 0              | 3     | 6                    | 6       | 2       | 0       | 14    | 9.7   |
| 10       | 0                     | 0.8                         | 3                 | 0              | 3     | 4                    | 0       | 0       | 0       | 4     | 4     |
| 9        | 0                     | 0.8                         | 4                 | 0              | 4     | 4                    | 0       | 0       | 0       | 4     | 4     |
| 7        | 0.01                  | 0.8                         | 2                 | 0              | 2     | 4                    | 0       | 0       | 0       | 4     | 4     |
| 8        | 0.01                  | 0.8                         | 3                 | 0              | 3     | 4                    | 0       | 0       | 0       | 4     | 4     |
| 6        | 0.02                  | 0.8                         | 5                 | 0              | 5     | 3                    | 2       | 0       | 0       | 5     | 4     |
| 5        | 0.02                  | 0.8                         | 17                | 0              | 17    | 3                    | 0       | 0       | 0       | 3     | 3     |
| 4        | 0.03                  | 0.8                         | 3                 | 0              | 3     | 3                    | 1       | 0       | 0       | 4     | 3.5   |
| 3        | 0.03                  | 0.8                         | 16                | 4              | 20    | 4                    | 3       | 0       | 0       | 7     | 5.5   |
| 1        | 0.04                  | 0.8                         | 2                 | 0              | 2     | 6                    | 5       | 0       | 0       | 11    | 8.5   |
| 2        | 0.04                  | 0.8                         | 2                 | 0              | 2     | 6                    | 3       | 0       | 0       | 9     | 7.5   |

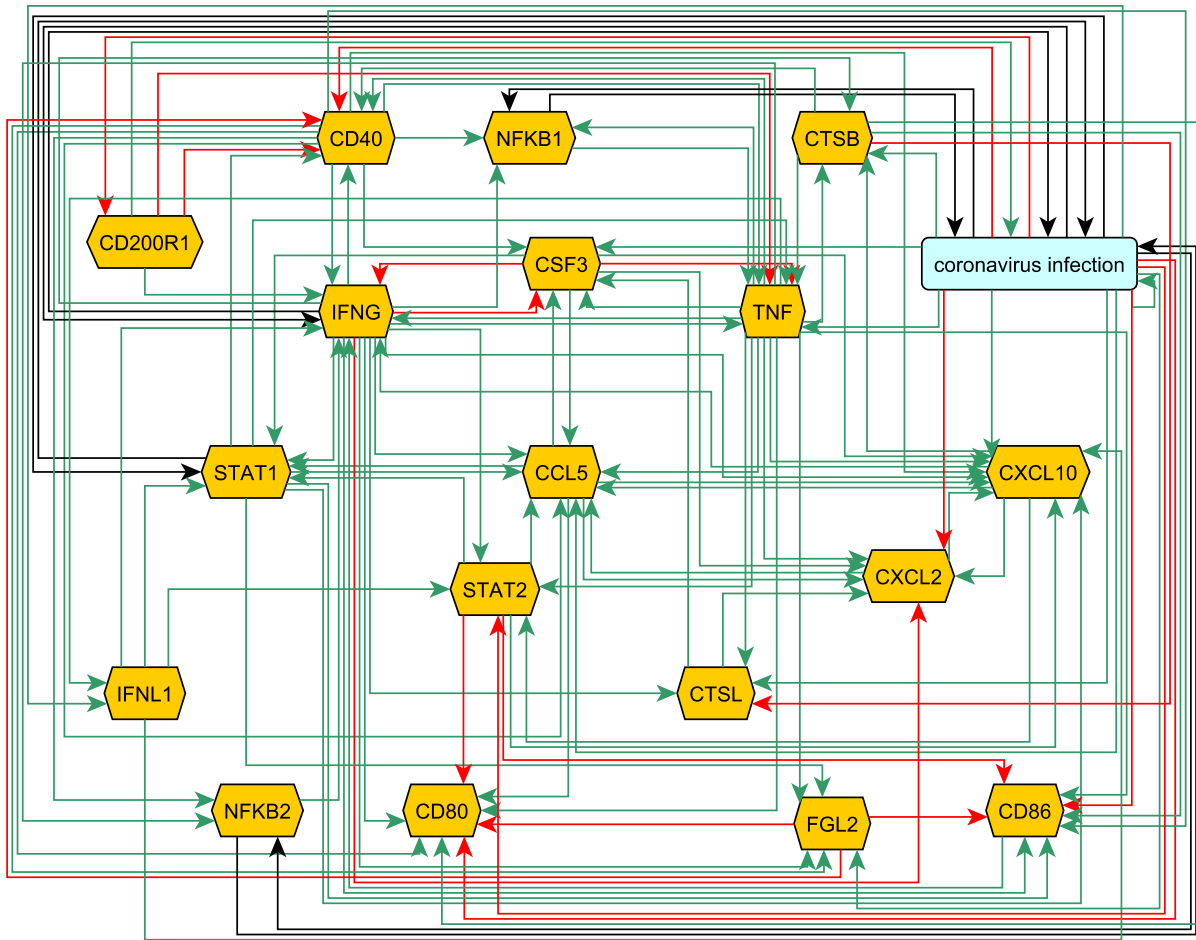

**Fig. S1.** Network structure of the SARS-CoV immune regulatory model [?]. The model contains 19 entites (nodes) and 112 regulatory actions (edges) which were obtained from biomedical literature using Pathway Studio\*. The color of the edges indicates the mode-of-action for the regulation, where green is an activating mode-of-action, red is an inactivating mode-of-action, and black is an unknown mode-of-action. Generated using yEd [?].

\* Copyright © 2021 Elsevier Limited except certain content provided by third parties. Pathway Studio is a trademark of Elsevier Limited.

---

**Algorithm S1** Attractor Search as a Constraint Satisfaction Problem

---

**Require:**  $n$  is the period of the attractor

**Ensure:**  $X$  is an attractor

```
1: function ATTRACTORSEARCH( $n$ )
2:    $X \leftarrow (n + 1) \times |V|$  matrix ▷  $|V|$  is the number of entities in the model
3:    $I \leftarrow (n + 1) \times |V|$  matrix
4:   for  $i \leftarrow 1$  to  $n$  do ▷ combine the constraints in this block by logical conjunction (i.e.  $\wedge$ )
5:      $I[i, :] = \text{COMPUTEIMAGE}(X[i, :])$ 
6:      $X[i + 1, :] = H^s(X[i, :])$  ▷  $H^s$  is the synchronous update function using  $I$ 
7:     if  $n > 1$  then
8:        $X[i + 1, :] \neq X[i, :]$ 
9:     end if
10:  end for
11:   $X[1, :] = X[n + 1, :]$  ▷ constrain the first and last row of  $X$  to be equal
12:   $X = \text{INCREASING}(X)$  ▷ constrain the sum of each row in  $X$  to be increasing
13:  return  $X$ 
14: end function
```

---
